# Supplementary material
Source: publisher figshare collection journal article supplement (https://acs.figshare.com/ndownloader/files/15112385)

## SUPPORTING INFORMATION

### Development of Novel Imidazole-Poly(ethylene glycol) Solvent for the Conversion of Lignocellulosic Agro Residues to Valuable Chemicals

Piyali Dhar,<sup>1</sup> Ann Mary Jose,<sup>1</sup> Giovanni Pilloni<sup>2</sup> and Ravikrishnan Vinu<sup>1,\*</sup>

<sup>1</sup>Department of Chemical Engineering and National Centre for Combustion Research and Development, Indian Institute of Technology Madras, Chennai-600036, India

<sup>2</sup>Corporate Strategic Research, Exxon Mobil Research and Engineering, Annandale, U.S.A.

Figure S1. FTIR spectra of imidazole, PEG200 and IPEG solvents.

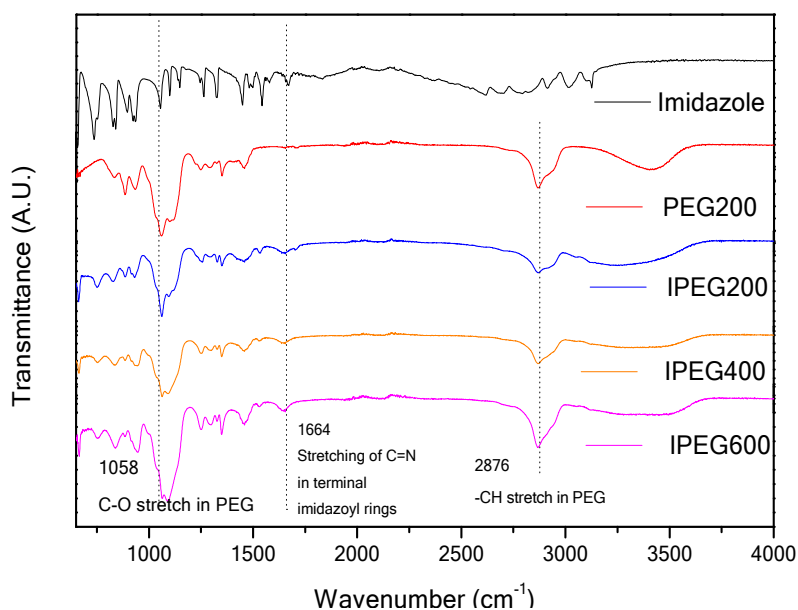

| Wavenumber (cm <sup>-1</sup> ) | Functional group assignment                    |
|--------------------------------|------------------------------------------------|
| 1058                           | C-O stretch in PEG                             |
| 1664                           | Stretching of C=N in terminal imidazolyl rings |
| 2876                           | -CH stretch in PEG                             |
| 3300                           | O-H stretch                                    |
| 1252-1356                      | Primary or secondary OH, in-plane bend         |

\* Corresponding Author. Email: vinu@iitm.ac.in. Phone: +91-44-22574187

**Figure S2. XRD profiles of raw and pre-treated rice straw. The marked peaks correspond to cellulose.**

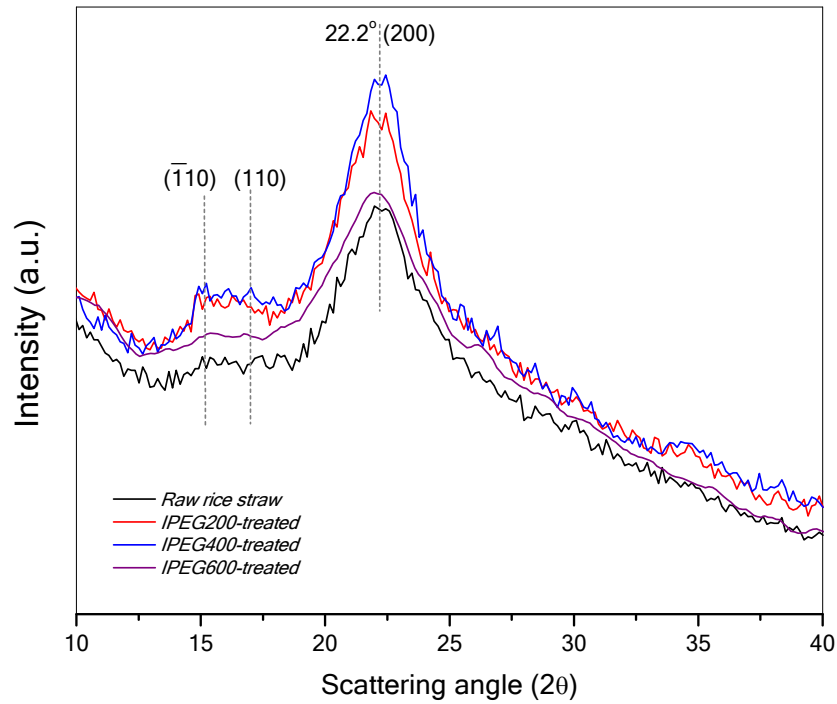

**Table S1. Segal crystallinity index and LOI of raw and pre-treated biomass**

| Pretreatment solvent | Rice straw (CrI %) | Rice straw LOI | Sugarcane bagasse (CrI%) | Sugarcane bagasse LOI |
|----------------------|--------------------|----------------|--------------------------|-----------------------|
| Untreated            | 75.5               | 0.43           | 74.7                     | 0.60                  |
| IPEG200              | 74.3               | 0.43           | 73.5                     | 0.57                  |
| IPEG400              | 76.6               | 0.42           | 78.5                     | 0.61                  |
| IPEG600              | 68.7               | 0.60           | 78.8                     | 0.64                  |

Segal crystallinity index (CrI%) was calculated using the expression:

$$Segal\ CI = \frac{I_{total} - I_{am}}{I_{total}} \times 100$$

Where  $I_{total}$  is the intensity of the major peak at 22.2°, and  $I_{am}$  is the intensity at 18°, which lies in between the major peaks and the minor peaks in the range of 14-16°.

Lateral order index (LOI) was calculated as the ratio of absorbance of the FTIR vibrations at 1430 and 898 cm<sup>-1</sup>, respectively.

$$LOI = \frac{A_{1430}}{A_{898}}$$

where A<sub>1430</sub> represents the absorption due to -CH<sub>2</sub> symmetric bending and A<sub>898</sub> represents -CH deformation in cellulose. LOI, also defined as the empirical CrI, is shown to be sensitive to the amount of crystalline versus amorphous regions in the cellulose, and its lower value reflects a more disordered structure (Karimi and Taherzadeh, Bioresour. Technol. 200 (2016) 1008-1018).

**Figure S3. QTOF MS spectra of spent liquid obtained from rice straw pre-treatment using IPEG200 solvent showing the presence of dimers and trimers of lignin in the m/z range of 217 to 527 g mol<sup>-1</sup>.**

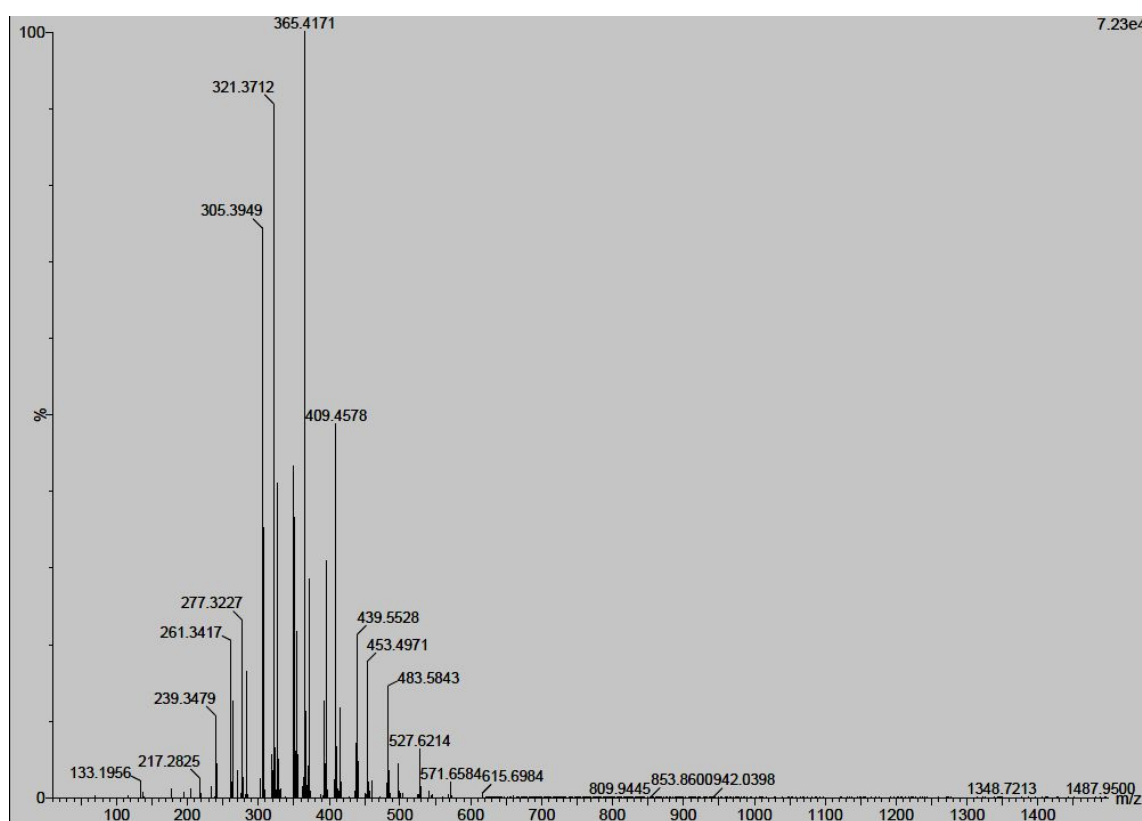

**Figure S4. UV-visible spectra of IPEG200 phase and acetone phase obtained after liquid-liquid extraction of products.**

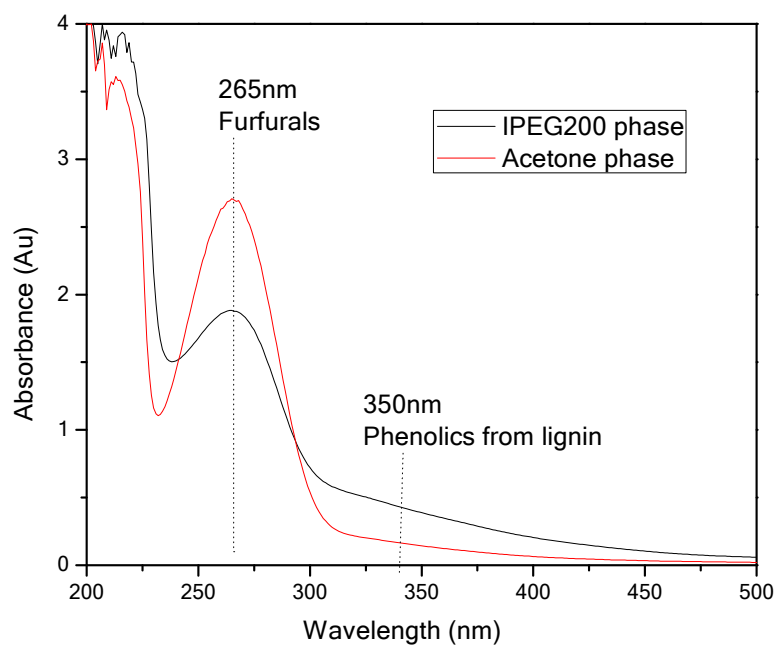

Supplement: Supplementary file 1 [file 15112385]
